# Supplementary material
Source: PubMed Central journal article supplement (PMC1450148)

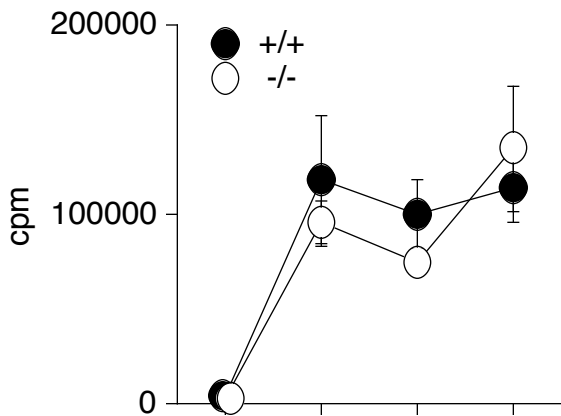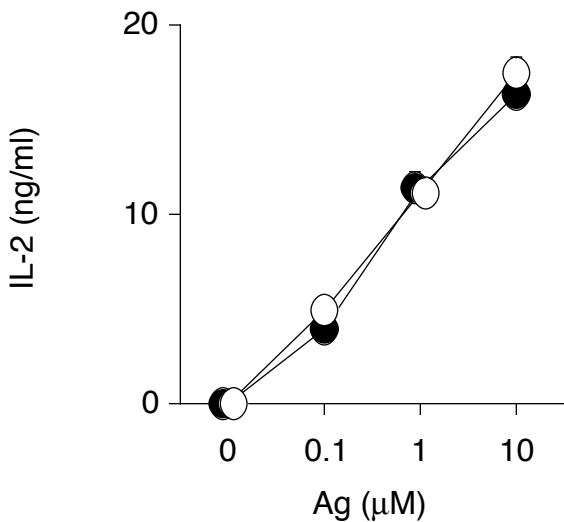

Supplement: pnas_0600205103_1.pdf [file pnas_0600205103_1.pdf]

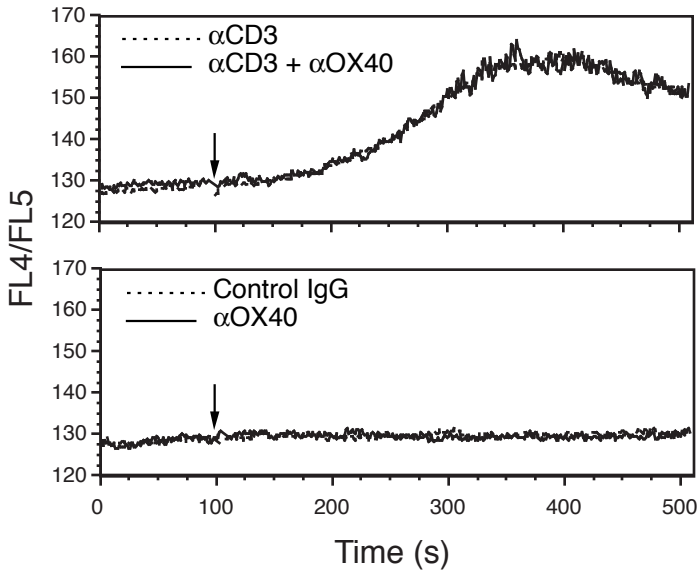

Supplement: pnas_0600205103_2.pdf [file pnas_0600205103_2.pdf]

BL/6 splenocytes CD4

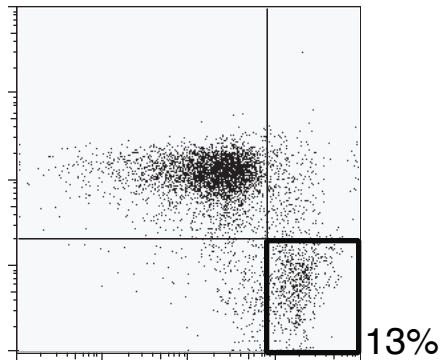

Purified CD4 (wild-type OTII)

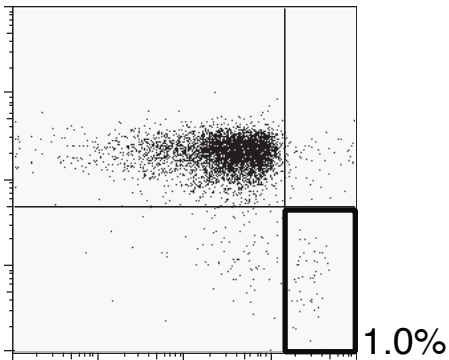

Purified CD4 (BL/6)

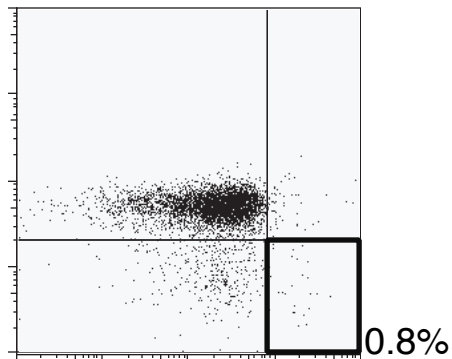

Purified CD4 (OX40<sup>-/-</sup> OTII)

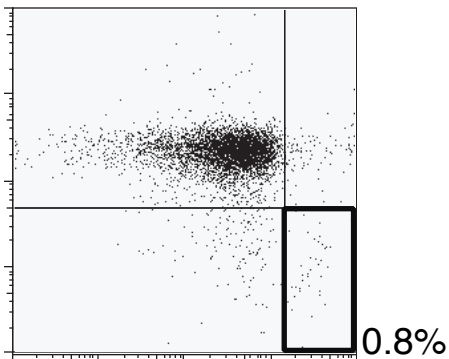

CD62L  
↑  
← CD44

Supplement: pnas_0600205103_3.pdf [file pnas_0600205103_3.pdf]
